# Supplementary material
Source: Springer Nature journal article supplement (https://www.springermedizin.de/resource/supplementary/12947_2013_469_MOESM1_ESM.pdf/9555810)

55 consecutive patients

2 patients excluded due to lack of consent  
3 patients excluded due to echocardiographic reasons

50 patients included

Laboratory measurements day 1 and daily (7 days) transthoracic echocardiography (TTE)

Measurements lost due to death, discharge from ICU or to technical reasons

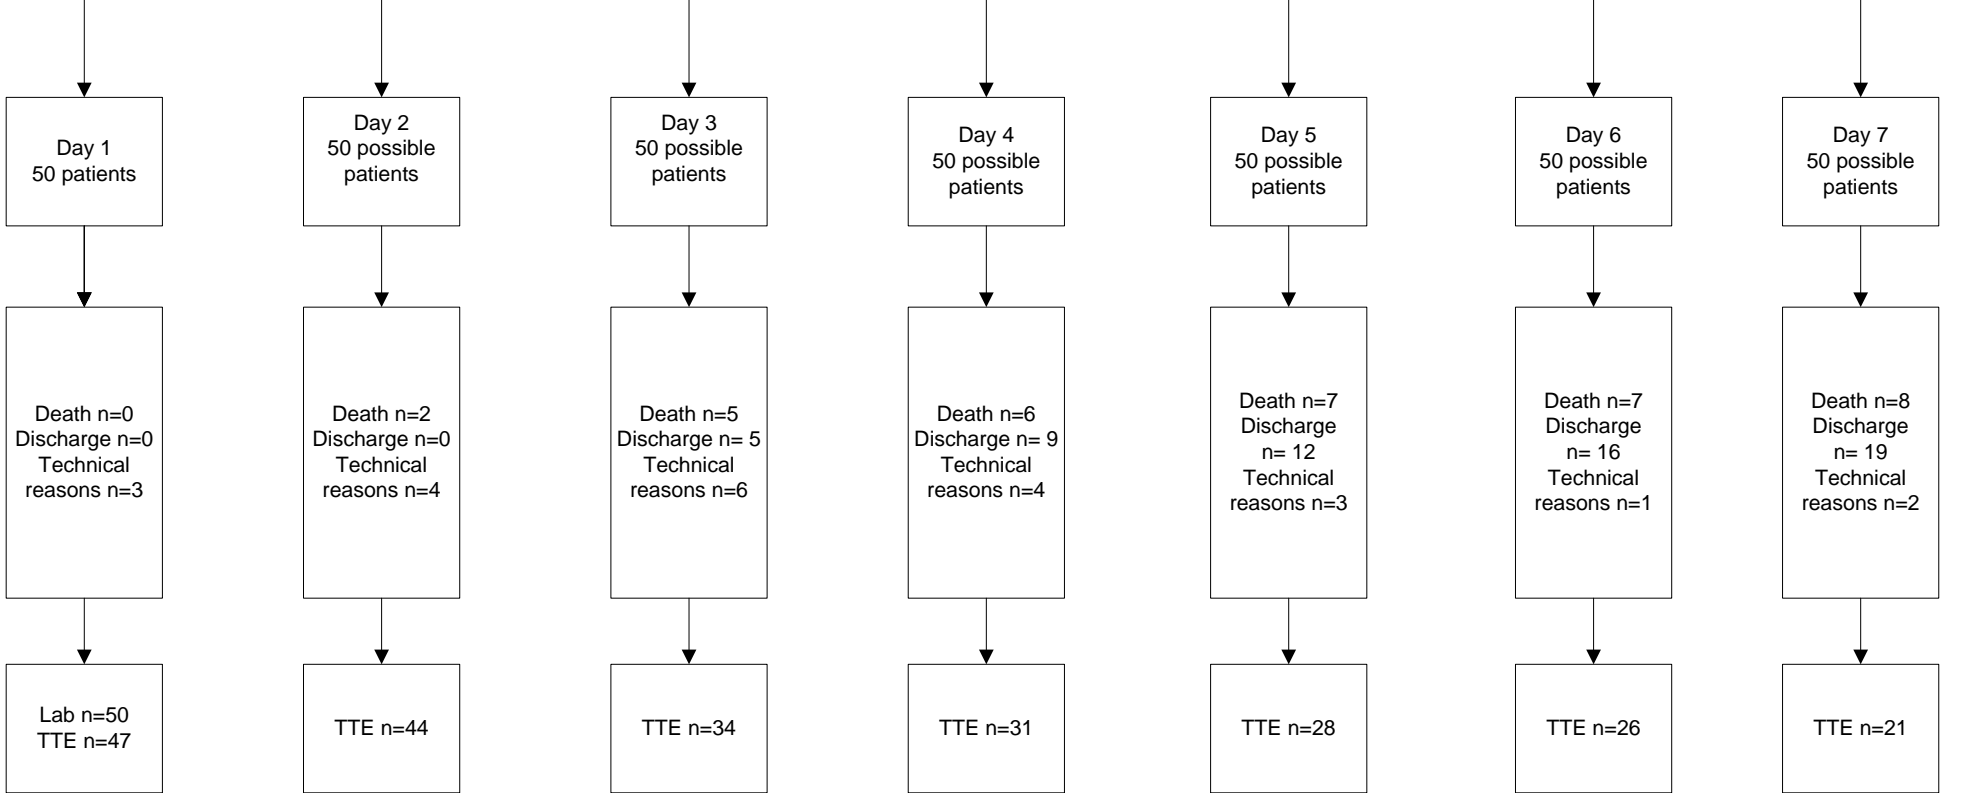

Supplement: MOESM1 [file 9555810]
